# Supplementary material for: Flexible and hollow polypyrrole foam with high loading of metal–organic framework nanowires for wearable supercapacitors
Source: Royal Society of Chemistry journal article supplement (doi:10.1039/d1ta05330b), 2021-01-01
Supplement: d1ta05330b1.pdf [file d1ta05330b1.pdf]

## Supporting Information

### Flexible and Hollow Polypyrrole Foam with High Loadings of Metal-Organic Framework Nanowires for Wearable Supercapacitors

Ting Yue <sup>a</sup>, Abdoukader Ibro Douka <sup>a</sup>, Kai Qi <sup>a, b, c, \*</sup>, Yubing Qiu <sup>a, b, c</sup>, Xingpeng Guo <sup>d</sup>, Bao Yu Xia <sup>a, b, c</sup>

<sup>a</sup> School of Chemistry and Chemical Engineering, Huazhong University of Science and Technology, Wuhan, 430074, P.R. China

<sup>b</sup> Key Laboratory of Material Chemistry for Energy Conversion and Storage (Ministry of Education), Huazhong University of Science and Technology, Wuhan, 430074, P.R. China

<sup>c</sup> Hubei Key Laboratory of Material Chemistry and Service Failure, Huazhong University of Science and Technology, Wuhan, 430074, P.R. China

<sup>d</sup> School of Chemistry and Chemical Engineering, Guangzhou University, Guangzhou, 510006, P.R. China

\* Corresponding Authors: [qikai@hust.edu.cn](mailto:qikai@hust.edu.cn) (K. Qi)

## ■ Experimental Section

**Synthesis of polypyrrole hollow foam (PPy HF).** Pyrrole was distilled and kept refrigerated in the dark before use. The purchased nickel foam was cut into a size of 12 cm × 10 cm and ultrasonized for 10 min in 1 M HCl, acetone, ethanol and ultra-pure water, respectively. The treated nickel foam was used as the working electrode, the platinum net was the counter electrode and the Ag/AgCl electrode was the reference electrode. Electrolyte solution configuration: 11 g of anhydrous sodium perchlorate was dissolved in 300 mL of aqueous solution and stirred until completely dissolved. Under the condition of sealing, N<sub>2</sub> was passed through to remove the oxygen in the above solution, and then 15 mL of pyrrole monomer was added. Under the above three-electrode condition, potentiostatic electrodeposition of 0.8 V vs. Ag/AgCl was conducted for 300 s. After electropolymerization, the nickel foam gradually turned black, and was rinsed with ultrapure water for 5 times. The resultant PPy coated nickel foam was fully etched in 1 M FeCl<sub>3</sub> for 5 h to remove the nickel skeletons and obtain the PPy hollow foam (PPy HF). Then, the PPy HF was taken out and rinsed with ultrapure water for 5 times. After that, 1.9 mg cm<sup>-2</sup> of PPy HF with certain flexibility was obtained by blowing dry in N<sub>2</sub>.

**Synthesis of polypyrrole hollow foam/Ni-CAT nanowires (PPy HF/Ni-CAT-NWs).** Ni-CAT-NWs is prepared by a modified method.<sup>[1, 2]</sup> 60 mg of nickel acetate was added into 20 mL of aqueous solution, and after it was completely dissolved, the PPy HF (2 cm × 2 cm) was soaked for 24 h. Then 20 mL of the prepared aqueous solution containing 42 mg of 2,3,6,7,10,11-hexahydroxytriphenylene (HHTP) was added and stirred slowly at 85 °C for 24 h. After the reaction, the product was taken out, and washed with deionized water and acetone for 5 times respectively to remove unreacted solvent and other impurities. The activated product was dried in a vacuum drying oven at 50 °C for 4 h to obtain the PPy HF/Ni-CAT-NWs composite, whose mass density was 3.7 mg cm<sup>-2</sup>. It can be calculated that the mass loading of Ni-CAT-NWs was 1.8 mg cm<sup>-2</sup>.

**Synthesis of Ni-CAT powders.** Similar to the preparation of the composite mentioned above, Ni-CAT

powders were synthesized without the addition of PPy HF. The obtained Ni-CAT powders were soaked in ultrapure water and acetone at 60 °C, and the water and acetone were changed every 5 h for 10 times. The activated Ni-CAT powders were dried in a vacuum drying oven at 60 °C for 12 h.

***Preparation of Ni-CAT-NWs and Ni-CAT-powders electrodes.*** The Ni-CAT-NWs and Ni-CAT-powders electrodes were prepared by the traditional slurry coating method. The active materials were mixed with polyvinylidene fluoride and conductive carbon (80:10:10, w/w/w) in N-methyl-2-pyrrolidone solution by stirring into a sticky slurry. Then the slurry was coated onto the carbon cloth and dried at 50 °C overnight under vacuum. The mass loadings of Ni-CAT-NWs and Ni-CAT-powders were about 2 mg cm<sup>-2</sup>, respectively.

***Assembly of symmetric flexible all-solid-state supercapacitor.*** The gel electrolyte was prepared by mixing 2 g polyvinyl alcohol (PVA) and 4.25 g of LiCl in 20 mL DI water at 85 °C with stirring into a homogeneous, clear and sticky gel solution. LiCl can be well dissolved in PVA gel without crystallization during the gel drying process. The PVA-LiCl gel electrolyte could maintain excellent electrochemical and mechanical properties without the requirement to be wetted periodically. Two pieces of identical PPy HF/Ni-CAT-NWs electrodes were immersed into the above solution and then lifted up. Symmetrical two electrodes were allowed to assemble into a flexible supercapacitor device. The PVA/LiCl gel was acted as both the electrolyte and separator. Furthermore, to avoid moisture from the air, Paramembrane® was used to seal the supercapacitor device.

***Characterizations.*** SEM and EDX were performed with a field-emission scanning electron microscope (FE-SEM, Nova NanoSEM 450) at an accelerating voltage of 10 kV. XRD patterns is conducted on a PANalytical B.V. x'pert3 powder X-ray diffractometer with Cu K $\alpha$  radiation ( $\lambda = 1.5405 \text{ \AA}$ ) at 30 kV and 20 mA from 10° to 35° with a scanning increment of 0.02°. TEM and high-resolution TEM images were obtained with a Tecnai G2 20 scope at an acceleration voltage of 200 kV. N<sub>2</sub> adsorptions experiments were measured on a Quantachrome Autosorb-1 automatic volumetric instrument. A liquid nitrogen bath (77 K) was used for

isotherm measurements. Ultra-high purity grade N<sub>2</sub> was used to the adsorption experiments. XPS spectra was collected by a monochromatic Al-K $\alpha$  X-ray source ( $h\nu = 1486.6$  eV, Kratos, AXIS-ULTRA DLD-600W). Thermogravimetric analysis (TGA) was performed on a Pyris 1 TGA (PerkinElmer Instruments) under air atmosphere at a heating rate of 5 °C min<sup>-1</sup>. Infrared Spectroscopy (IR) was conducted on Equinox55 equipment.

**Electrochemical measurements.** The electrochemical performance of these electrodes were studied in a three-electrode cell in 3 M KCl aqueous electrolytes with Ag/AgCl and Pt plate as the reference electrode and counter electrode, respectively. All electrochemical measurements were performed on a CHI 660E electrochemical workstation. The areal capacitances were calculated using the following equations (1) to (2). Electrochemical performance of assembled flexible supercapacitor device were tested in a two-electrode configuration, where the areal energy ( $E$ ) and power densities ( $P$ ) were calculated using the following equations (3) to (4).

Areal capacitance ( $C_s$ )

$$C_s(\text{F cm}^{-2}) = \int I_1 dU / 2\nu SU \quad (1)$$

$$C_s(\text{F cm}^{-2}) = I_2 t / SU \quad (2)$$

Energy density ( $E$ ) and Power density ( $P$ )

$$E = \frac{CU^2}{(2 \times 3600)} \quad (3)$$

$$P = E \times \frac{3600}{t} \quad (4)$$

where  $I_1$  (A) is the response current of CV,  $U$  (V) is the voltage window (voltage drop IR-drop has been considered for galvanostatic charging/discharging),  $\nu$  (V s<sup>-1</sup>) is the scan rate,  $I_2$  (A) is the discharging current,  $t$  (s) is the discharging time,  $S$  (cm<sup>2</sup>) is the area of the electrode or supercapacitor device.

■ Supplementary Figures

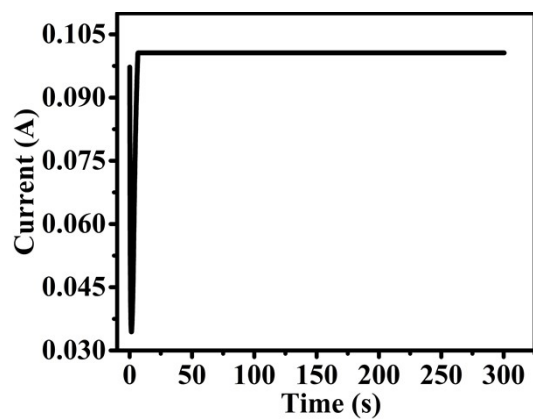

**Figure S1.** Current-time curve during the electrodeposition of PPy onto the nickel foam.

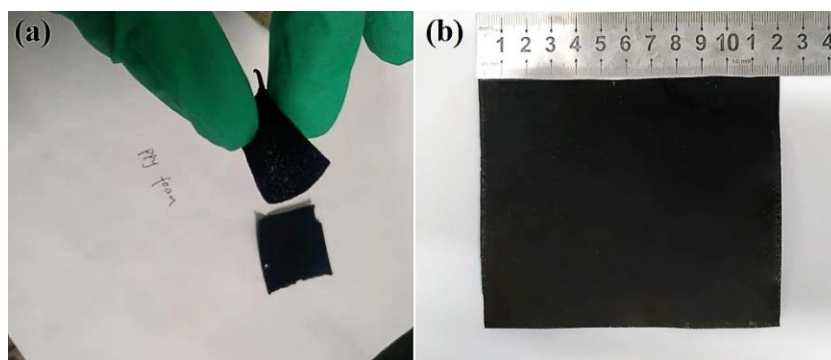

**Figure S2.** Digital photos of (a) PPy HF and (b) PPy HF/Ni-CAT-NWs.

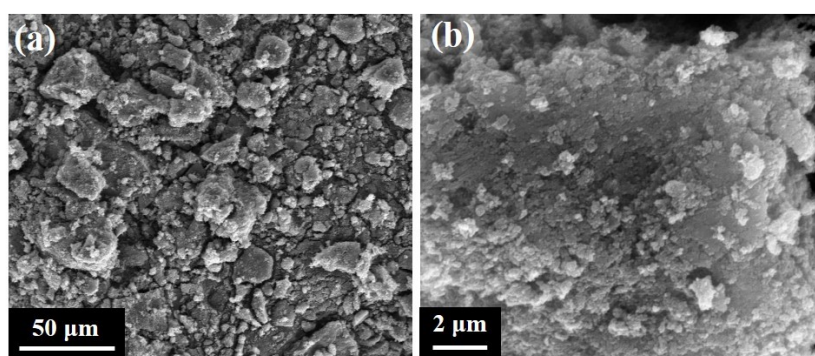

**Figure S3.** SEM images of different multiples for Ni-CAT powders.

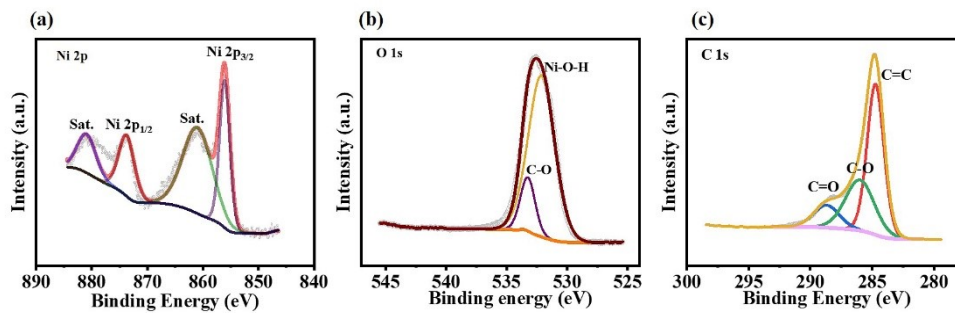

**Figure S4.** XPS spectra of (a) Ni 2p, (b) O 1s, and (c) C 1s in PPy HF/Ni-CAT-NWs.

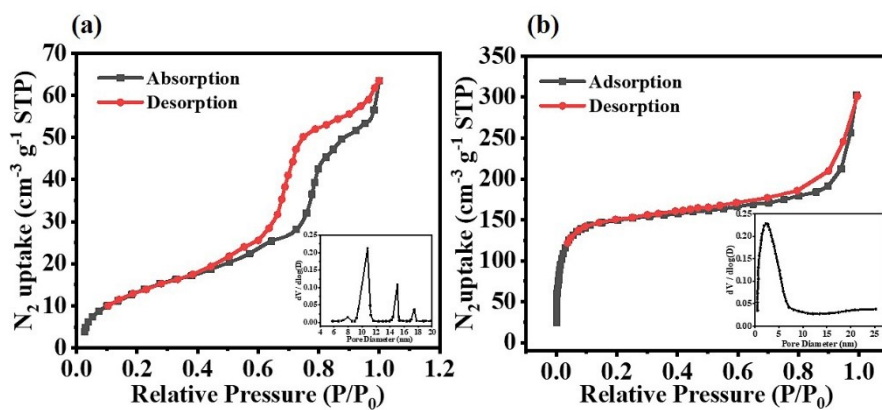

**Figure S5.** N<sub>2</sub> sorption isotherms of (a) PPy HF and (b) Ni-CAT-NWs.

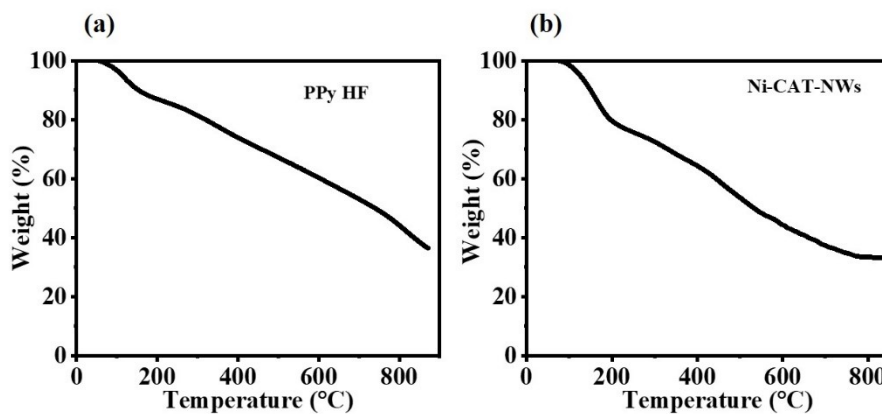

**Figure S6.** Thermal gravimetric analysis of (a) PPy HF and (b) Ni-CAT-NWs.

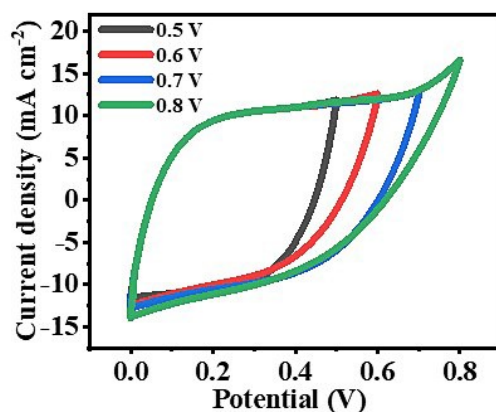

**Figure S7.** CV curves (at  $5 \text{ mV s}^{-1}$ ) collected over various potentials for PPy HF/Ni-CAT-NWs.

As shown in Figure S7 for the CV curves (at  $5 \text{ mV s}^{-1}$ ) of PPy HF/Ni-CAT-NWs, with the potential window increasing from 0-0.5 V to 0-0.8 V vs. Ag/AgCl, the polarization in the high potentials would obviously increase. Therefore, 0-0.5 V vs. Ag/AgCl is selected as the test potential window in the aqueous electrolyte.

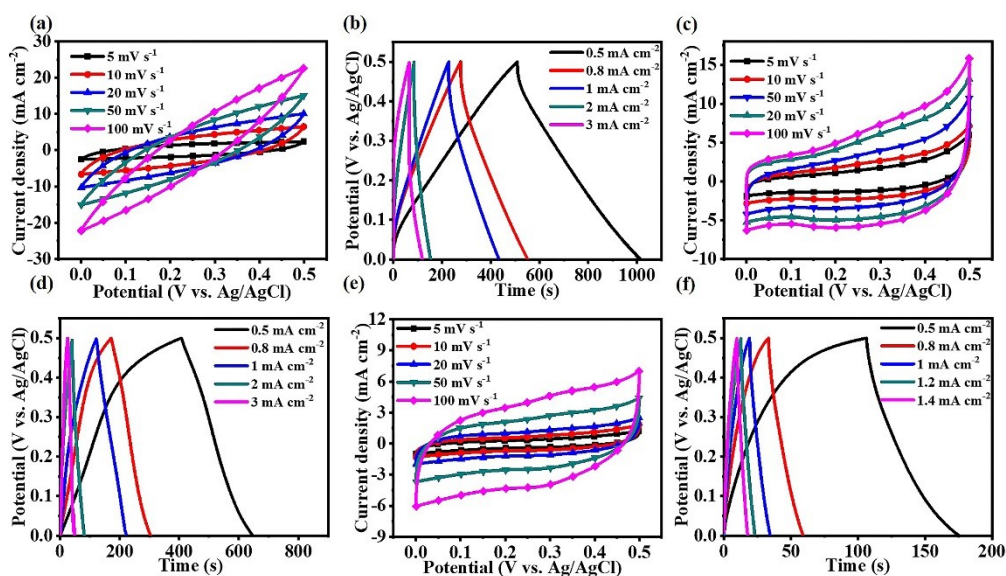

**Figure S8.** (a) CV and (b) GCD curves of PPy HF electrode. (c) CV and (d) GCD curves of Ni-CAT-NWs electrode. (e) CV and (f) GCD curves of Ni-CAT-powders electrode.

The mass specific capacitances of PPy HF/Ni-CAT-NWs, PPy HF, Ni-CAT-NWs, and Ni-CAT-powders electrodes are  $283.9 \text{ F g}^{-1}$ ,  $266.2 \text{ F g}^{-1}$ ,  $133.3 \text{ F g}^{-1}$  and  $34.6 \text{ F g}^{-1}$  respectively. The volume specific capacitances of PPy HF/Ni-CAT-NWs, PPy HF, Ni-CAT-NWs, and Ni-CAT-powders electrodes are  $30.9 \text{ F cm}^{-3}$ ,  $16.3 \text{ F cm}^{-3}$ ,  $10.4 \text{ F cm}^{-3}$  and  $2.8 \text{ F cm}^{-3}$  respectively.

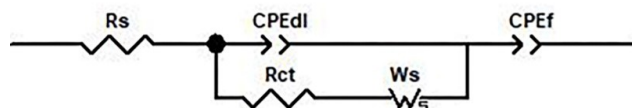

**Figure S9.** Equivalent circuit of the electrodes.  $R_s$  is electrolyte resistance;  $CPE_{dl}$  is electrical double-layer capacitance;  $R_{ct}$  is charge transfer resistance;  $W_s$  is Warburg diffusion process;  $CPE_f$  is pseudocapacitance.

The high-frequency part of EIS is a depressed tiny capacitive reactance arc composed of electric double layer capacitance  $CPE_{dl}$  and interface charge transfer resistance  $R_{ct}$ . As the frequency decreases, the electrochemical reaction gradually develops from the electrode interface to the inside. The middle-frequency part impedance is controlled by diffusion, which appears as a section of Warburg impedance in the equivalent circuit. When the frequency reduces to the low-frequency part, the electrochemical reaction extends to the entire electrode, the charge is saturated and remains unchanged with the potential changing. The impedance appears as a straight line approximately perpendicular to the real axis, which shows pure capacitive behavior.

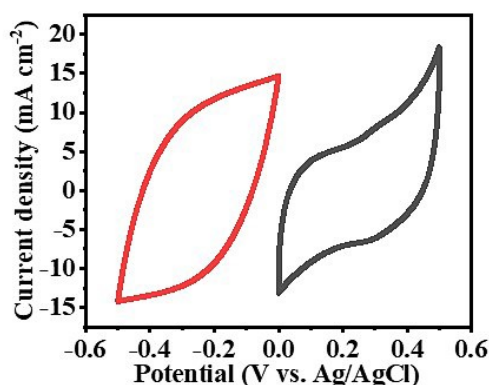

**Figure S10.** CV curves of PPy HF/Ni-CAT-NWs in a three-electrode system. The working potential window has been explored by cycling cathodically between 0 and -0.5 V and anodically between 0 and 0.5 V (vs Ag/AgCl).



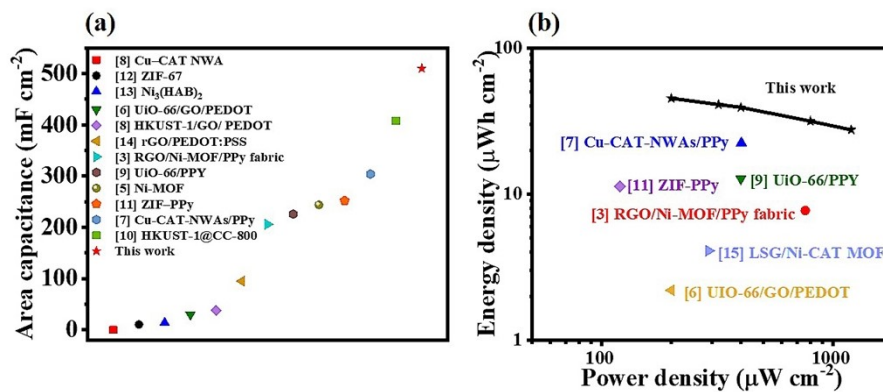

**Figure S11.** (a) Areal capacitance [3-14] and (b) Ragone plot with areal energy and power densities as well as comparison with some literature data. [3, 6, 7, 9, 11, 15]

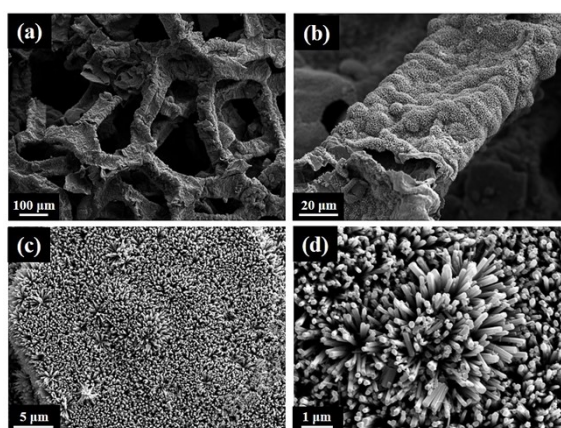

**Figure S12.** SEM images of PPy HF/Ni-CAT-NWs after cycled charging/discharging.

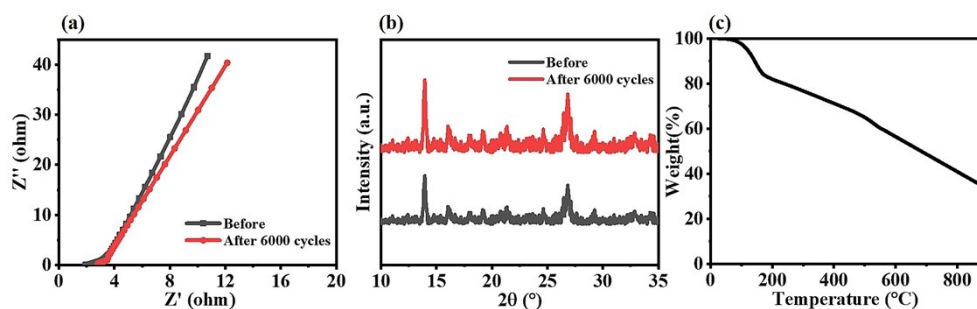

**Figure S13.** (a) EIS, (b) XRD and (c) thermal gravimetric analysis of PPy HF/Ni-CAT-NWs before and after 6000 cycles of charging/discharging.

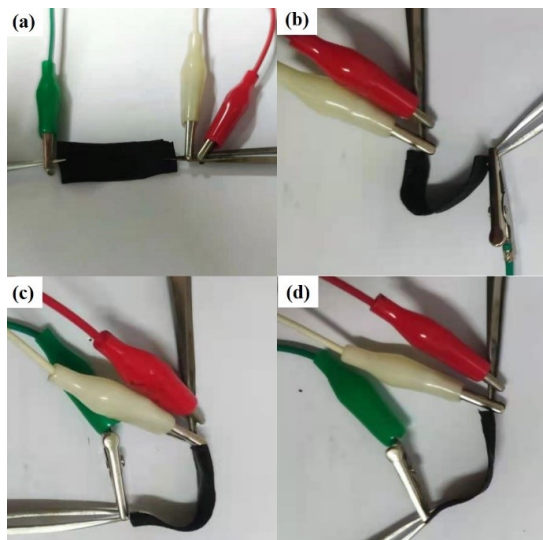

**Figure S14.** Different bending angles of the supercapacitor based on PPy HF/Ni-CAT-NWs.

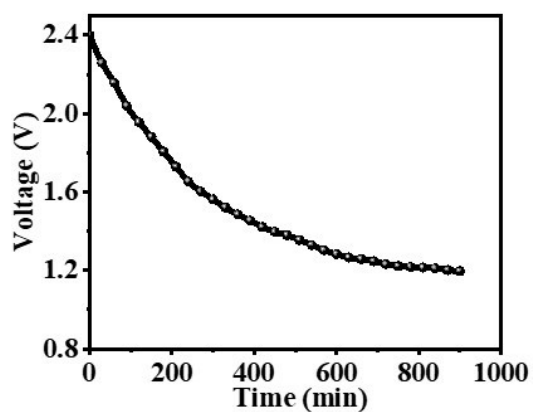

**Figure S15.** Self-discharging curve of three supercapacitors in series.

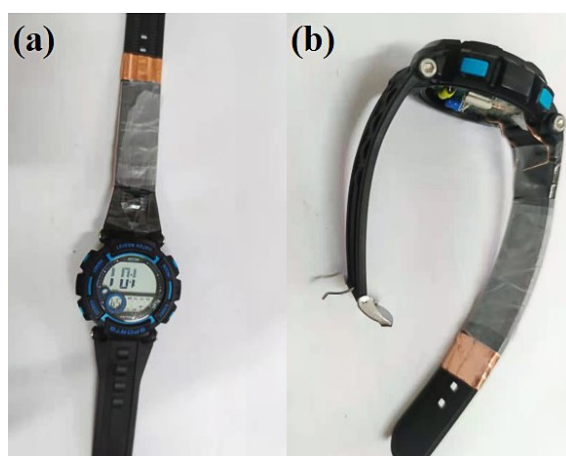

**Figure S16.** Digital photos of the supercapacitor with the area of  $2\text{ cm} \times 6\text{ cm}$  fabricated into a wearable wristband to drive an electronic watch.

## ■ References

- [1] S. Zhou, X. Kong, B. Zheng, F. Huo, M. Stromme, C. Xu, *ACS nano*. **2019**, *13*, 9578-9586.
- [2] M. Hmadeh, Z. Lu, Z. Liu, F. Gándara, H. Furukawa, S. Wan, V. Augustyn, R. Chang, L. Liao, F. Zhou, E. Perre, V. Ozolins, K. Suenaga, X. Duan, B. Dunn, Y. Yamamoto, O. Terasaki, O. M. Yaghi, *Chemistry of Materials* **2012**, *24*, 3511-3513.
- [3] C. Cheng, J. Xu, W. Gao, S. Jiang, R. Guo, *Electrochimica Acta*. **2019**, *318*, 23-31.
- [4] D. Fu, H. Li, X.-M. Zhang, G. Han, H. Zhou, Y. Chang, *Materials Chemistry and Physics*. **2016**, *179*, 166-173.
- [5] C. Yang, X. Li, L. Yu, X. Liu, J. Yang, M. Wei, *Chemical Communications*. **2020**, *56*, 1803-1806.
- [6] D. Fu, H. Zhou, X.-M. Zhang, G. Han, Y. Chang, H. Li, *ChemistrySelect*. **2016**, *1*, 285-289.
- [7] R. Hou, M. Miao, Q. Wang, T. Yue, H. Liu, H. S. Park, K. Qi, B. Y. Xia, *Advanced Energy Materials*. **2020**, *10*, 1901892.
- [8] W.-H. Li, K. Ding, H.-R. Tian, M.-S. Yao, B. Nath, W.-H. Deng, Y. Wang, G. Xu, *Advanced Functional Materials*. **2017**, *27*, 1702067.
- [9] K. Qi, R. Hou, S. Zaman, Y. Qiu, B. Y. Xia, H. Duan, *ACS Applied Materials & Interfaces*. **2018**, *10*, 18021-18028.
- [10] D.-J. Li, S. Lei, Y.-Y. Wang, S. Chen, Y. Kang, Z.-G. Gu, J. Zhang, *Dalton Transactions*. **2018**, *47*, 5558-5563.
- [11] X. Xu, J. Tang, H. Qian, S. Hou, Y. Bando, M. S. A. Hossain, L. Pan, Y. Yamauchi, *ACS applied materials & interfaces*. **2017**, *9*, 38737-38744.
- [12] S. D. Worrall, H. Mann, A. Rogers, M. A. Bissett, M. P. Attfield, R. A. W. Dryfe, *Electrochimica Acta*. **2016**, *197*, 228-240.
- [13] S. C. Wechsler, F. Z. Amir, *ChemSusChem*. **2020**, *13*, 1491-1495.
- [14] C. Zhao, X. Jia, K. Shu, C. Yu, G. G. Wallace, C. Wang, *Journal of Materials Chemistry A*. **2020**, *8*, 4677-4699.
- [15] H. Wu, W. Zhang, S. Kandambeth, O. Shekhah, M. Eddaoudi, H. N. Alshareef, *Advanced Energy Materials*. **2019**, *9*, 1900482.
